# Supplementary material
Source: PubMed Central journal article supplement (PMC6178956)

## Supplementary Figures

**Figure 1.** Compartmental structure of the final model for pantoprazole and pantoprazole sulfone.

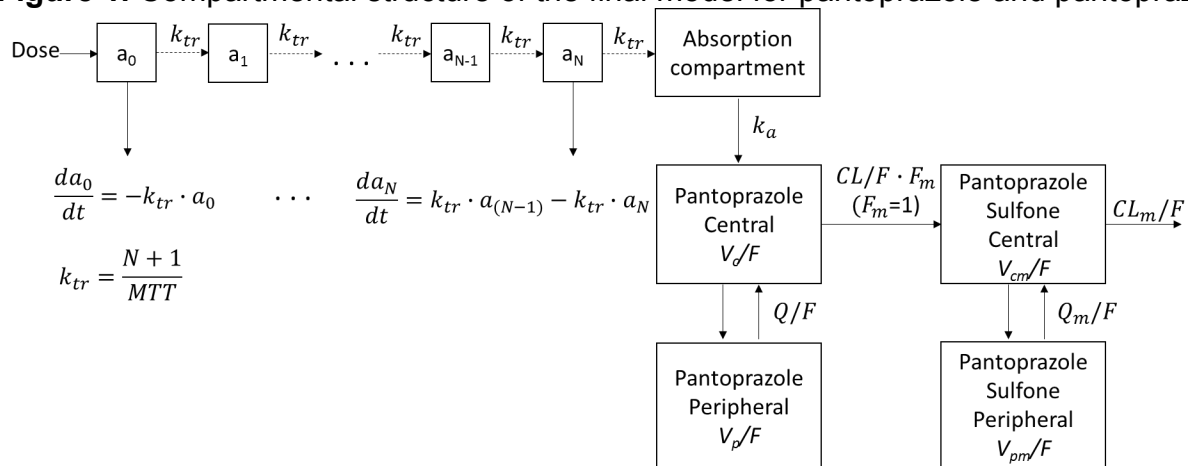

Supplement: NIHMS1503443-supplement-1.pdf [file NIHMS1503443-supplement-1.pdf]
